# Supplementary material for: ABBA regulates plasma-membrane and actin dynamics to promote radial glia extension
Source: Oxford University Press journal article supplement (doi:10.1242/jcs.027466), 2008-04-15
Supplement: jcs027466-sup-027466-figs1.pdf [file jcs027466-sup-027466-figs1.pdf]

A

|              |                                                                                     |     |
|--------------|-------------------------------------------------------------------------------------|-----|
| IRSp53       | MSLSRSSEEMHRLTEVYKTIMEQFN---PSLRNFIAIMGKNYEKALAGVTFAAKGYFDALVXMGELASEQ--GSKELGDLV   | 76  |
| IRTKS        | MSRG--PEEVNRLTENTYRNVMEQFN---PGLRNLINLGKNYERAVNAMILAGKAYYDGVAKIGEIATGSP--VSTELGHVL  | 75  |
| ABBA         | MET--AEKCCGALGG-LFQAIIVNDMKSSYPWEDFNASKAALKHSQRLRTVLAAVAFLDFAQKVADMAINTRGATRDIGSAL  | 78  |
| MIM          | MEAVIEKCCSALGG-LFQIIISDMKGSYPWEDFINKAGKLSQRLRTVVAFAFLDFAQKVADMAINTRGATRDIGSAL       | 79  |
| FLJ22582     | -MAFEMDQFYRSTIMATYKTIMEQFN---PALENLVVLGNVYLAFAHALSEAAEVVFSAIQKIGEQALQSS--TSCILGEIL  | 75  |
| .: : : : : * |                                                                                     |     |
| IRSp53       | FCMAEVHRRQIQNLEETLKSFFNELLTQLEQKVELDSRYLSAALKKYQTEQRSGKDALDKQASLKKLRKKSQG--SKNP     | 154 |
| IRTKS        | TEISSTHKKLNETLDENFKKFKHKDIIHELEKTELDVVKYMNATLKRYOAEHRNKLDSLEKSOAELKKIRRSQG--GRNA    | 153 |
| ABBA         | TRMCMRHSIETKLRQFTNALLESLINPLOBERIEDWKKSANQLDKDHAKEYKRARHEIKKSSDILKLOKKARK---GK      | 154 |
| MIM          | TRMCMRHSIETAKLRQFSSALIDCLINPLOBEOMEWKKVANQLDKDHAKEYKRARHEIKKSSDILKLOKKARKVDAQGR     | 159 |
| FLJ22582     | VQMSDTQSRHLNSDLEVVVQTFHGDLLQHMKNQKLMQPTKDSCHYEIEYRHRRAANLEKCMSELWRMERKRDK-----      | 149 |
| .: : : : *   |                                                                                     |     |
| IRSp53       | QKYSDKELQYIDALSNKQGELENYVSDGYKTALTEERRRRCFLVEKQCAVAKNSAAVHSGKKELLAQKLPLWQACADPN     | 234 |
| IRTKS        | LKYEHKEIEYVETVTSRQSEIKKFTADGCKEALLLEKRRFCFLVDKHCSPASHIHYHMQSABLNSKLPRWQETCCDAT      | 233 |
| ABBA         | GDLPQLDSALQDVNDMYLLLEETEKQAVRRALIEERGRFCTFITFLQPVVNGELTMLG--EITHLQGIIDDLVVLADPH     | 233 |
| MIM          | GDIPQLDSALQDVNDKYLLLEETEKQAVRKALIEERGRFCTFISMLRPVIEEISMLG--EITHLQTTSEDLKSLTMDPH     | 238 |
| FLJ22582     | -----NAREMKESVNRRLHAQMCQAFVSTSKRAAELEKRRYRFLAEKHLNLSNTPTLQFLGRARGMLQNRVLLWKEQ--SEAS | 223 |
| : : : : : *  |                                                                                     |     |
| IRSp53       | KIPDRAVQLMQMANSN                                                                    | 251 |
| IRTKS        | KVPEKIMNMIEIKTP-                                                                    | 249 |
| ABBA         | KLPASEVVIDLKGS-                                                                     | 249 |
| MIM          | KLPSSSEVVIDLKGS-                                                                    | 254 |
| FLJ22582     | RSPRAHSPGLGPAL-                                                                     | 239 |
| : *          |                                                                                     |     |

B

|                        |                                                                                        |     |
|------------------------|----------------------------------------------------------------------------------------|-----|
| Mus musculus           | METAKECCGALGGLFQAIVNDMKSSYPWEDFNASKAALKHSQRLRTVLAAVAFLDFAQKVADMAINTRGATRDIGSALTR       | 80  |
| Homo sapiens           | METAKECCGALGGLFQAIVNDMKSSYPWEDFNASKATLHSQRLRTVLAAVAFLDFAQKVADMAINTRGATRDIGSALTR        | 80  |
| Gasterosteus aculeatus | METAKECCGALGGLFQAIVNDMKSSYPWEDFATAKATLHSQRLRTVLAAVAFLDFAQKVADMAINTRGATRDIGSALTR        | 80  |
| Xenopus tropicalis     | MESVKECCGALGGLFQAIIINDMKNSYPWEDFSSKATLHSQRLRTVLAAVAFLDFAQKVADMAINTRGATRDIGSALTR        | 80  |
| *: : : : : *           |                                                                                        |     |
| Mus musculus           | MCMRHSIETKLRQFTNALLESLINPLOBERIEDWKKSANQLDKDHAKEYKRARHEIKKSSDILKLOKKARK---GKGD         | 157 |
| Homo sapiens           | MCMRHSIETKLRQFTNALLESLINPLOBERIEDWKKSANQLDKDHAKEYKRARHEIKKSSDILKLOKKARKKELGKGD         | 160 |
| Gasterosteus aculeatus | MCMRHSIETAKLRQFTNALLESLINPLOBEDWKKTANQLDKDHAKEYKRARHEIKKSSDILKLOKKARKANPGRVDL          | 160 |
| Xenopus tropicalis     | MCMRHSIETSKLRHFTNALLESLINPLOBERIEDWKKTANQLDKDHAKEYKRARHEIKKSSDILKLOKKARK---GKGD        | 157 |
| *: : : : : *           |                                                                                        |     |
| Mus musculus           | QPOLDALQDVNDMYLLLEETEKQAVRRALIEERGRFCTFITFLQPVVNGELTMLGEITHLQGIIDDLVVLADPHKLP          | 237 |
| Homo sapiens           | QPOLDALQDVNDMYLLLEETEKQAVRRALIEERGRFCTFITFLQPVVNGELTMLGEITHLQGIIDDLVVLADPHKLP          | 240 |
| Gasterosteus aculeatus | QPOVDSAMQDVTDMLLMEETEKQAVRRALIEERGRFCTFIVIGLQPVVNGELTMLGEITHLQAIIDDLVVLADPHKLP         | 240 |
| Xenopus tropicalis     | QPOLDHALQDVNDMYLLLEETEKQAVRRALIEERGRFCSFITLLQPVVNGELHMLAEVTHLQAIIDDLVVLADPHKLP         | 237 |
| *: : : : : *           |                                                                                        |     |
| Mus musculus           | ASEQ--VIKDLKGSYDSWSYQTPPSSPSSSSSRKSSMCS-----LA                                         | 276 |
| Homo sapiens           | ASEQ--VIKDLKGSYDSWSYQTPPSSPSSSSSRKSSMCSAP-----SSSSAKGGGAPWPGGAQYSP--SSTCRVRLA          | 311 |
| Gasterosteus aculeatus | ASEQVVIDKDLKGSYDSWSYQTPPSSPSSSSGSRSSSVNSAHSSARSSGGGVGVGGGSGPSPRVRSSLPHQPL              | 320 |
| Xenopus tropicalis     | ASEQ--VITDLKGSYDTSYQTPPSSPSSSSGSRKSSMCS-----Y                                          | 275 |
| *: : : : : *           |                                                                                        |     |
| Mus musculus           | QPATT--RLSSVSSHDSGFVSQDP--TYSKPPSPMPSDITSQKSSSSASSEASETCQSVSECSSTPDSWTKAGPHEQPSA-      | 352 |
| Homo sapiens           | QPATTARLSSVSSHDSGFVSQDA--TYSKPPSPMPSDITSQKSSSSASSEASETCQSVSECSSTPDSWTKVGSHEQPSG-       | 389 |
| Gasterosteus aculeatus | PGGIAAHLRLSSVSSHDSGFVSQDVITYSKPPSPMP--DITSQKSSSSASSEASETCQSVSECSSTPDSWTKAQYEQPVAP      | 399 |
| Xenopus tropicalis     | VASLHAGSGSLVSSHDSGCSHSEA--SYSKPPSPMPSDITSQK-----LLSSDLAMVLTGRGLSLEHQKSSRDSLQ           | 317 |
| : * : : : *            |                                                                                        |     |
| Mus musculus           | TTLQRRKRDVEHLRDTTEPGFTGGCTVGSAG--EEVPRTRMSPATIAAKHGEVSPAASDLAMVLTGRGLSLEHQKSSRDSLQ     | 431 |
| Homo sapiens           | ATLQRRKRDVELLRDTTEPGPAGGGTLPSSG--EAPPRTRMSPATIAAKHGEVSPAASDLAMVLTGRGLSLEHQKSSRDSLQ     | 468 |
| Gasterosteus aculeatus | AAVQRKKEPLDLRLRENEMSPSSQGGSPSHPDQAQRHMTPTAIAKHGEVSPAASDLAMVLTGRGLSMEQQKSSRDSLQ         | 479 |
| Xenopus tropicalis     | -----RGGGPAPRGGPQKQNALNRNSPVCSCTCPDLHLK-----LLSSDLAMVLTGRGLSLEHQKSSRDSLQ               | 380 |
| * . * : : : : *        |                                                                                        |     |
| Mus musculus           | YSSGYSTQTTTPSCSEDTPISQG-----SDYDCYSVNGDAD--SEGPPFEDKSSSTIPRNSNIAQNYRRLIOTKR            | 498 |
| Homo sapiens           | YSSGYSTQTTTPSCSEDTPISQGRGWG-----SDYDCYSVNGDAD--SEGPPFEDKSSSTIPRNSNIAQNYRRLIOTKR        | 539 |
| Gasterosteus aculeatus | YSSGYSTQTTTPSCSEDTPISQG-----SDYDCYSVNGDAD--SEGPPFEDKSSSTIPRNSNIAQNYRRLIOTKR            | 547 |
| Xenopus tropicalis     | YSSGYSTQTTTPSCSEDTPISQGIKFQKQSTGFS-----SDYDCYSVNGDAD--GDGSGEFDRSSTVPRSSSLAQNRYRRLIOTKR | 459 |
| *: : : : : *           |                                                                                        |     |
| Mus musculus           | PASTAGLPT-----AGLPTAMGLP--SGAPPGVATIRRTFSTKPTVRRALSSAGPIPIRPPPIVPVKTPVTPV--DS          | 564 |
| Homo sapiens           | PASTAGLPT-----AGLPTATGLP--SGAPPGVATIRRTFSTKPTVRRALSSAGPIPIRPPPIVPVKTPVTPV--DS          | 605 |
| Gasterosteus aculeatus | PASTAGLPSGVLGPGGHGPQPGGAGGG--GAGTPGTATIRRTFSTKPTGVRRLSSAGPIPIRPPPIVPVKTPVTPV--DS       | 624 |
| Xenopus tropicalis     | PASTAGLPS-----AIPPSGAPPPPAASLPGVATIRRTFSTKPTVRRALSSAGPIPCRPPIVPVKTPVTPV--DS            | 528 |
| *: : : : *             |                                                                                        |     |
| Mus musculus           | PG---YVG-----PTRAGSEECVFYTDIVASPLAPDLAKASPKRLSLPNTAWGS--QSPEVASYGGGAAGVLATEDEE         | 632 |
| Homo sapiens           | PG---YMG-----PTRAGSEECVFYTDIVASPLAPDLAKASPKRLSLPNTAWGS--PSPEAAGYGP---AGAEDC            | 668 |
| Gasterosteus aculeatus | PGAAAYAGGGHSGGVFVRVSGSEECVFYTGVDGQGALDYVAKSPKRLSLPNTAWGSAALEVVYAAQHGGLALATGSEBD        | 704 |
| Xenopus tropicalis     | PG---GGLGG-----RVRVSGSEECVFYLGDDGN--PLDYAKSPKRLSLPNAWGGTGEMSVYGGGGG--FEEMGG            | 594 |
| *: : : : : *           |                                                                                        |     |
| Mus musculus           | QQLAANRHSLSVEKLGELVAGAHALGEGQFFFPALSAIPSEETPPPPPAATSDPP--AEDMLVAIRRVRLRRTVINDRS        | 710 |
| Homo sapiens           | QQLAANRHSLSVEKLGELVAGAHALGEGQFFFPALSAIPSEETPPPPPAATSDPP--AEDMLVAIRRVRLRRTVINDRS        | 746 |
| Gasterosteus aculeatus | QMIAANRHSLSVEKLGELVAGAHALGEGQFFFPALPDDPALPPPTGLTDAASGTGAGRSSGDMLTIRRVRLRRTVINDRS       | 784 |
| Xenopus tropicalis     | GLLAANRHSLSVEKLGELVAGAHALGDGQFFFPALPDKQSAP--ASSGAAAEPP--AGDMLASIRRVRLRRTVINDRS         | 670 |
| : *: : : : : *         |                                                                                        |     |
| Mus musculus           | APRIL                                                                                  | 715 |
| Homo sapiens           | APRIL                                                                                  | 751 |
| Gasterosteus aculeatus | APRIL                                                                                  | 789 |
| Xenopus tropicalis     | APRIL                                                                                  | 675 |
| : *                    |                                                                                        |     |
