# Supplementary figures and images for: ABBA regulates plasma-membrane and actin dynamics to promote radial glia extension
Source: Oxford University Press journal article supplement (doi:10.1242/jcs.027466), 2008-04-15

- GFP-ABBA  
- GFP MIM  
- GFP IRSp53

250 -  
150 -  
100 -  
75 -  
50 -  
37 -  
25 -

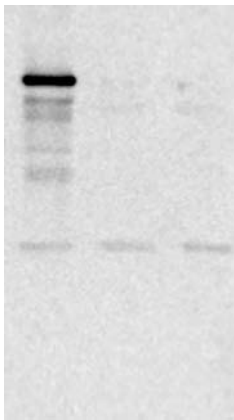

**anti-ABBA**

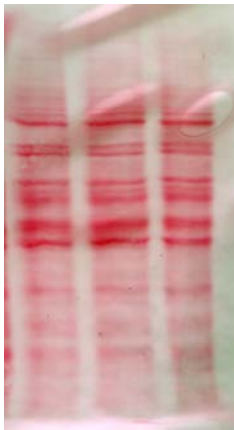

**Ponceau**

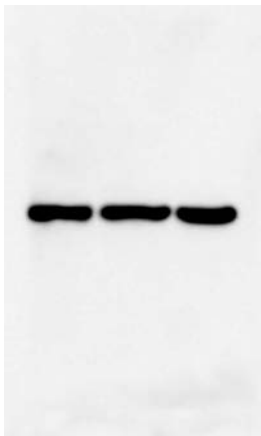

**anti-actin**

Supplement: jcs027466-sup-027466-figs2.pdf [file jcs027466-sup-027466-figs2.pdf]

**A**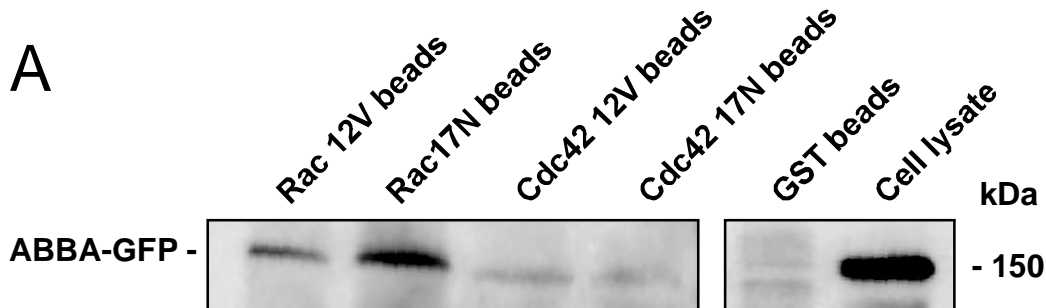**B**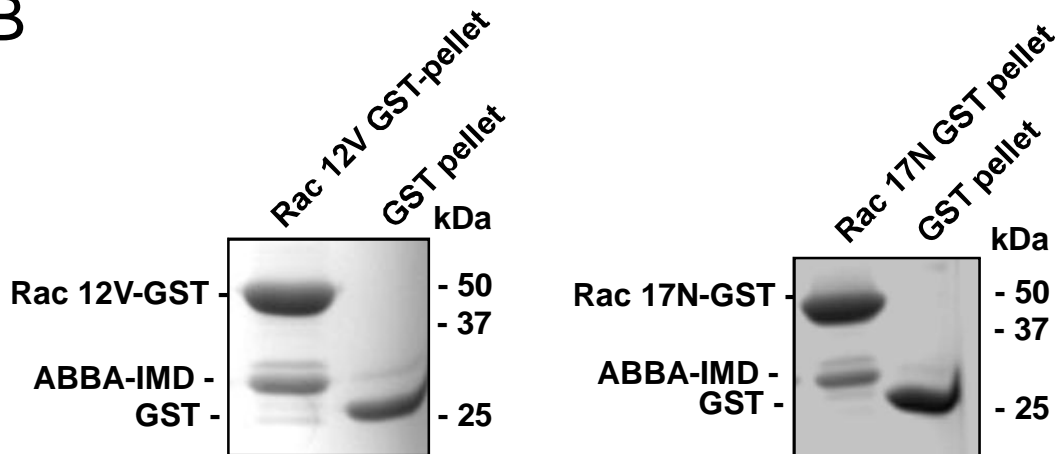

Supplement: jcs027466-sup-027466-figs3.pdf [file jcs027466-sup-027466-figs3.pdf]

**GFP****F-actin****Merge**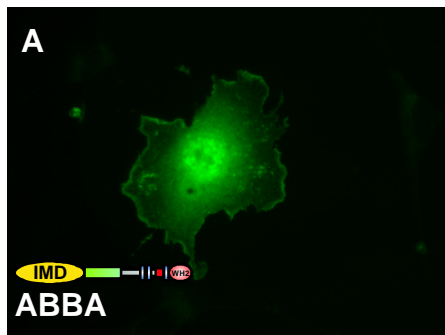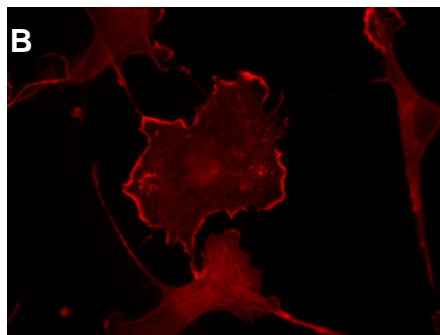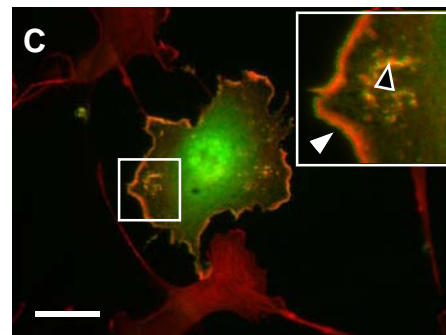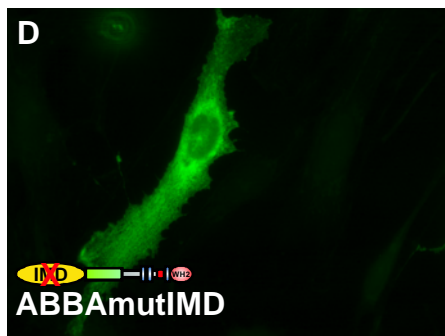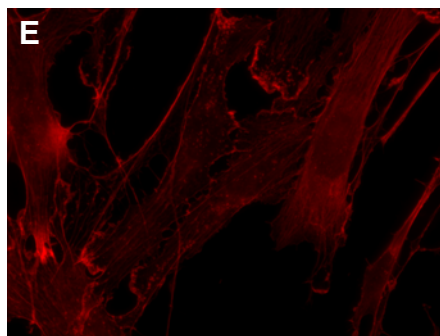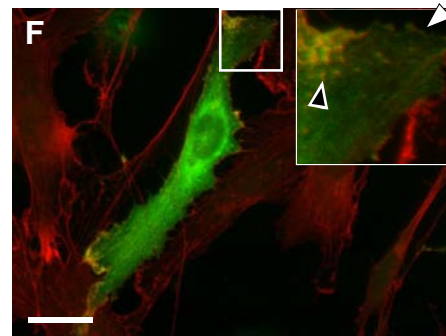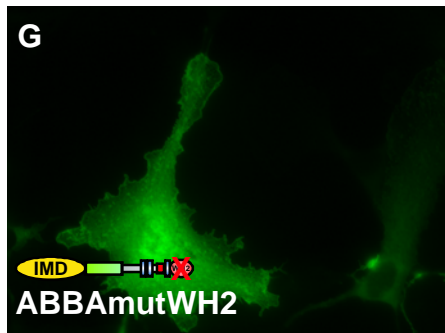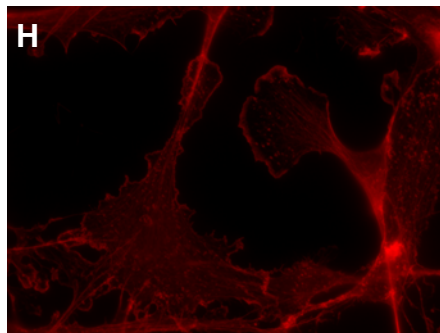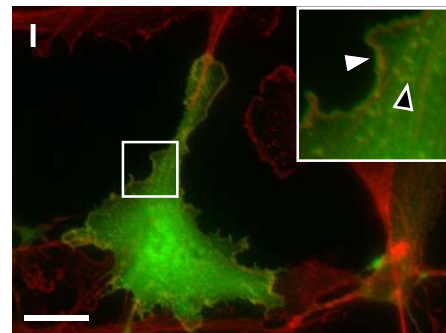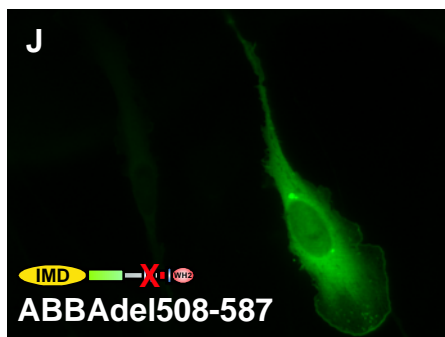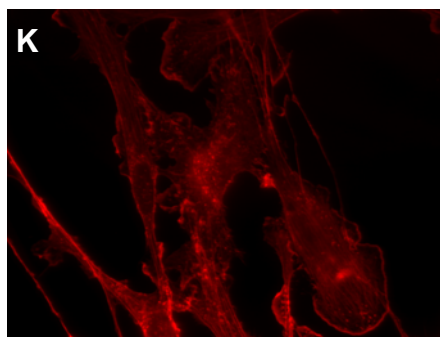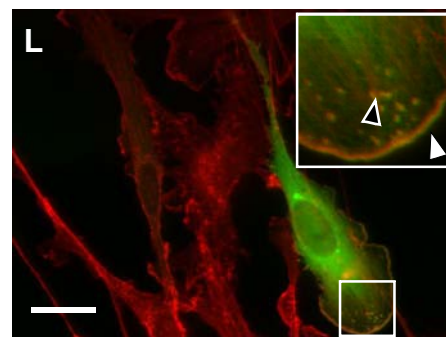

Supplement: jcs027466-sup-027466-figs4.pdf [file jcs027466-sup-027466-figs4.pdf]

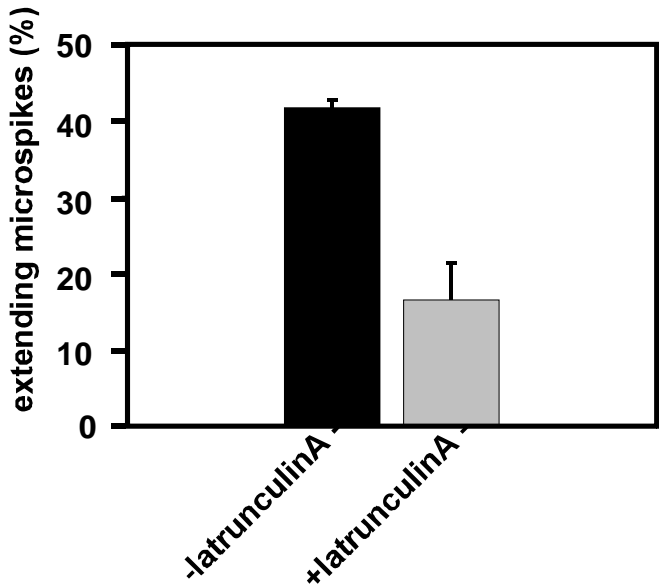

Supplement: jcs027466-sup-027466-figs5.pdf [file jcs027466-sup-027466-figs5.pdf]

**ABBA-IMD**

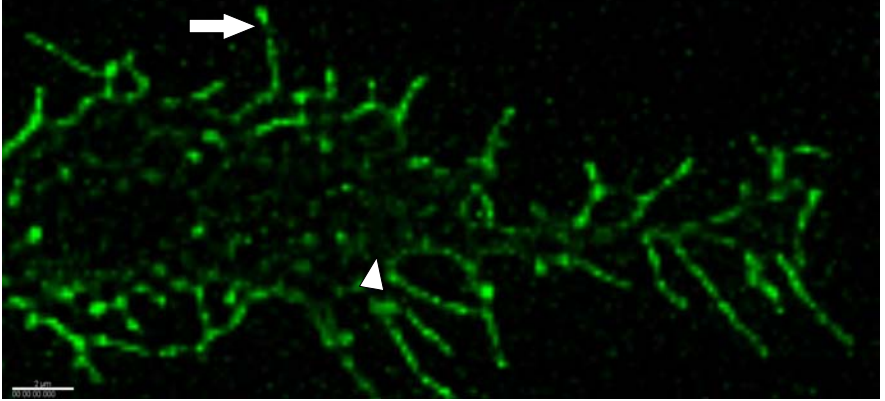

**F-actin**

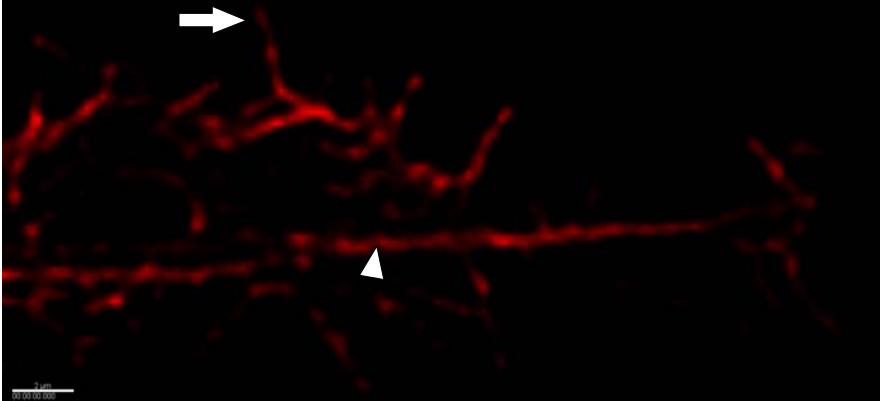

**ABBA-IMD**  
**F-actin**

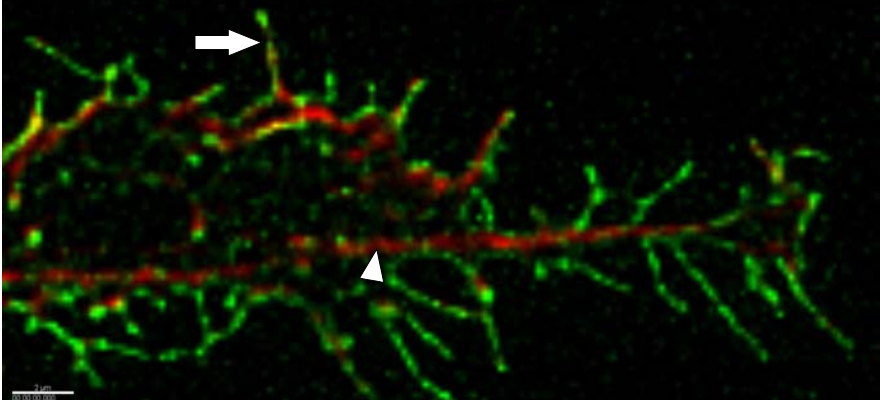

Supplement: jcs027466-sup-027466-figs6.pdf [file jcs027466-sup-027466-figs6.pdf]
